# Supplementary material for: Continuous Protein Supplementation Reduces Acute Exercise-Induced Stress Markers in Athletes Performing Marathon
Source: MDPI journal article supplement (doi:10.3390/nu13092929), 2021-08-24
Supplement: s1 [file s1]

**Supplementary Table S1.** Energy (EI) and macronutrient intake (expressed as a percentage of EI and relative to BW) in the tested study groups (Verum, Control) at the beginning (time point a) and end (time point b) of the intervention.

| Variable       | Verum ( <i>n</i> = 10) |             | Control ( <i>n</i> = 13) |            |
|----------------|------------------------|-------------|--------------------------|------------|
|                | a                      | b           | a                        | b          |
| EI (kcal/d)    | 2550 ± 860             | 2610 ± 570  | 2127 ± 600               | 2192 ± 630 |
| Protein (E%)   | 15 ± 2**               | 23 ± 3††    | 16 ± 4                   | 16 ± 3     |
| Fat (E%)       | 32 ± 6*                | 28 ± 4†     | 33 ± 6                   | 33 ± 5     |
| CHO (E%)       | 51 ± 5                 | 50 ± 4      | 48 ± 7                   | 51 ± 5     |
| Protein (g/kg) | 1.2 ± 0.4**            | 1.8 ± 0.2†† | 1.2 ± 0.4                | 1.2 ± 0.4  |
| Fat (g/kg)     | 1.2 ± 0.4              | 1.0 ± 0.3   | 1.1 ± 0.3                | 1.1 ± 0.4  |
| CHO (g/kg)     | 4.1 ± 1.3              | 4.4 ± 0.9   | 3.5 ± 0.9                | 3.7 ± 0.9  |

The results are presented as mean ± SD. \**p*<0.05 and \*\**p*<0.01 (intra-group comparisons between time points).  
†*p*<0.05 and ††*p*<0.01 (inter-group comparisons at time point).
